# Supplementary material
Source: Springer Nature journal article supplement (https://www.springermedizin.de/resource/supplementary/12916_2011_430_MOESM1_ESM.pdf/9599942)

**A**

embryonic cartilage

E13.5

E14.5

hip joint

Control

Nf1<sup>Prx1</sup>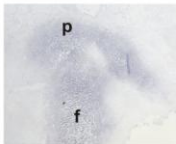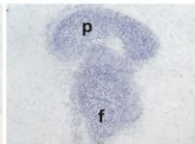

Control

Nf1<sup>Prx1</sup>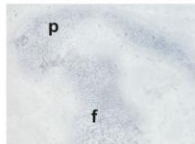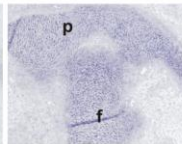**B**

postnatal cartilage

P4

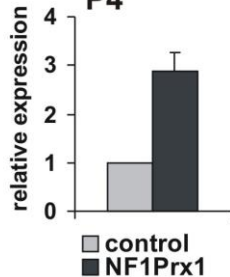

Supplement: MOESM1 [file 9599942]
